# Supplementary material for: PAMPS-graft-Ni3Si2O5(OH)4 multiwalled nanotubes as a novel nano-sorbent for the effective removal of Pb(ii) ions
Source: Royal Society of Chemistry journal article supplement (doi:10.1039/c9ra10971d), 2020-01-01
Supplement: c9ra10971d1.pdf [file c9ra10971d1.pdf]

## Supplementary Material

### PAMPS-graft- $\text{Ni}_3\text{Si}_2\text{O}_5(\text{OH})_4$ multiwalled nanotubes as a novel nano-sorbent for effective removal of Pb(II) ions

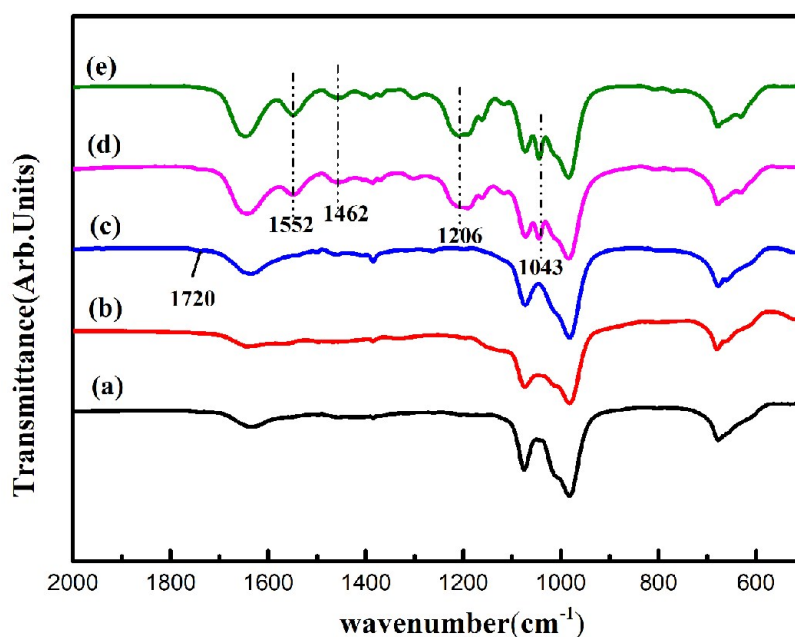

**Fig. S1** Partial enlarged drawing of FT-IR spectra. (a)  $\text{Ni}_3\text{Si}_2\text{O}_5(\text{OH})_4$ , (b)  $\text{Ni}_3\text{Si}_2\text{O}_5(\text{OH})_4\text{-NH}_2$ , (c)  $\text{Ni}_3\text{Si}_2\text{O}_5(\text{OH})_4\text{-Br}$ , (d)  $\text{Ni}_3\text{Si}_2\text{O}_5(\text{OH})_4\text{-g-PAMPS-1}$  prepared after 2 h ATRP reaction, (e)  $\text{Ni}_3\text{Si}_2\text{O}_5(\text{OH})_4\text{-g-PAMPS-2}$  prepared after 8 h ATRP reaction.

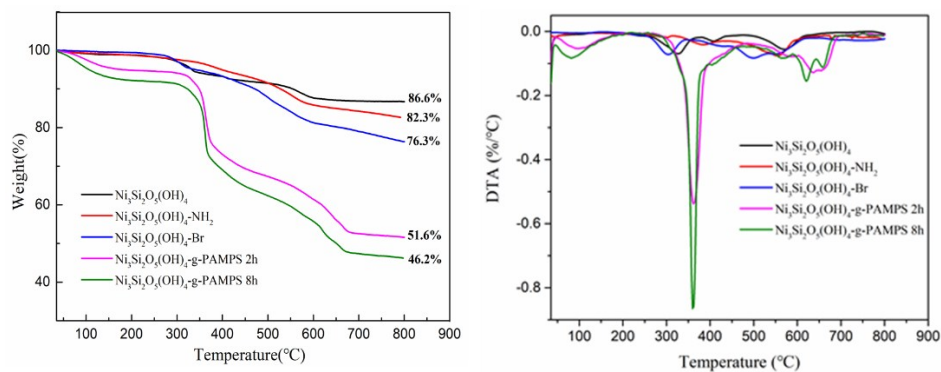

**Fig. S2** TG and DTA curves of  $\text{Ni}_3\text{Si}_2\text{O}_5(\text{OH})_4$ ,  $\text{Ni}_3\text{Si}_2\text{O}_5(\text{OH})_4\text{-NH}_2$ ,  $\text{Ni}_3\text{Si}_2\text{O}_5(\text{OH})_4\text{-Br}$ ,  $\text{Ni}_3\text{Si}_2\text{O}_5(\text{OH})_4\text{-g-PAMPS}$  with 2 h ATRP reaction, and  $\text{Ni}_3\text{Si}_2\text{O}_5(\text{OH})_4\text{-g-PAMPS}$  with 8 h ATRP reaction.

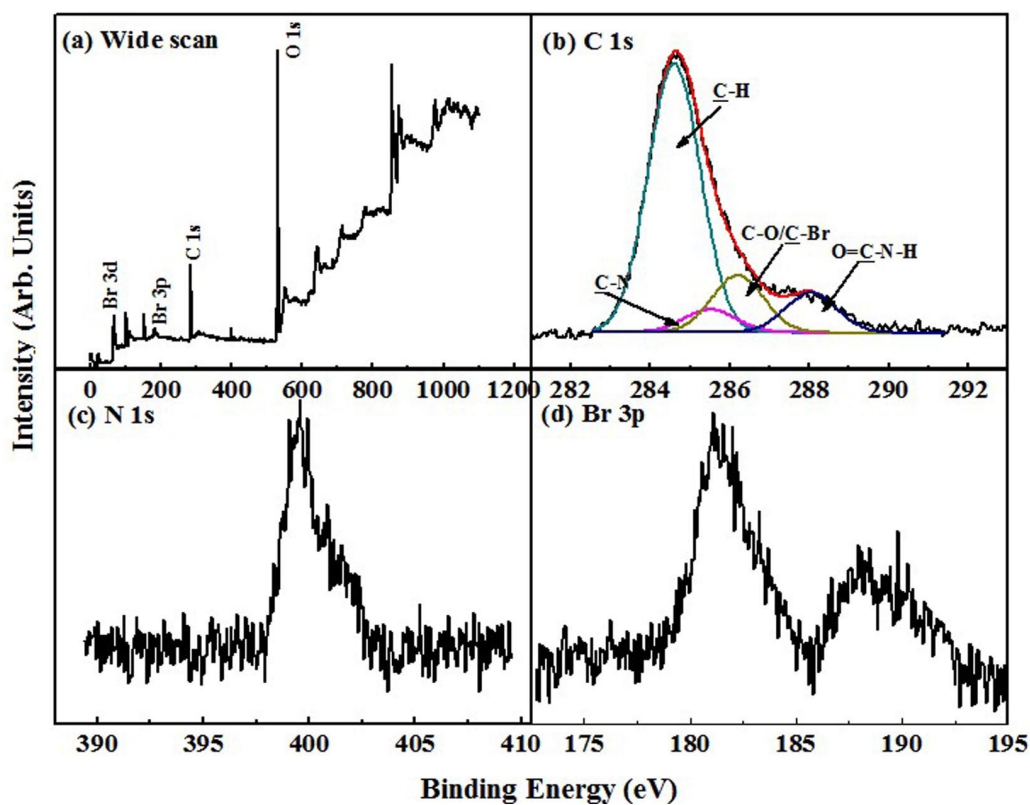

**Fig. S3** XPS spectra of the intermediate product  $\text{Ni}_3\text{Si}_2\text{O}_5(\text{OH})_4\text{-Br}$ .

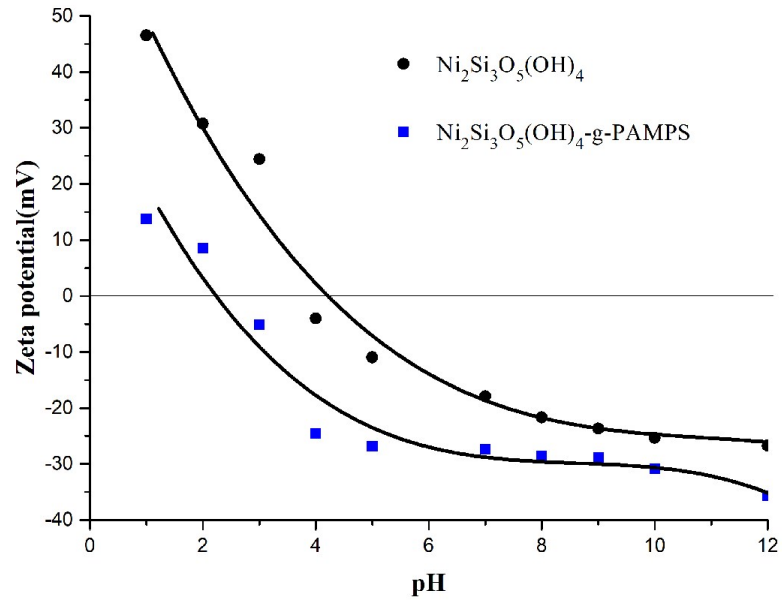

**Fig. S4** The Zeta potential of  $\text{Ni}_3\text{Si}_2\text{O}_5(\text{OH})_4$  and  $\text{Ni}_3\text{Si}_2\text{O}_5(\text{OH})_4\text{-g-PAMPS}$  under different pH.
